# Supplementary material for: Prevalence and correlates of sleep disturbance and depressive symptoms among Chinese adolescents: a cross-sectional survey study
Source: PubMed Central journal article supplement — BMJ Open. 2014 Jul 29;4(7):e005517. doi: 10.1136/bmjopen-2014-005517 (PMC4120320; doi:10.1136/bmjopen-2014-005517), 2014-07-29
Supplement: bmjopen-2014-005517.reviewer_comments.pdf [file bmjopen-2014-005517.reviewer_comments.pdf]

## PEER REVIEW HISTORY

BMJ Open publishes all reviews undertaken for accepted manuscripts. Reviewers are asked to complete a checklist review form (<http://bmjopen.bmj.com/site/about/resources/checklist.pdf>) and are provided with free text boxes to elaborate on their assessment. These free text comments are reproduced below. Some articles will have been accepted based in part or entirely on reviews undertaken for other BMJ Group journals. These will be reproduced where possible.

### ARTICLE DETAILS

|                            |                                                                                                                                  |
|----------------------------|----------------------------------------------------------------------------------------------------------------------------------|
| <b>TITLE (PROVISIONAL)</b> | Prevalence and Correlates of Sleep Disturbance and Depressive symptoms Among Chinese Adolescents: a cross-sectional survey study |
| <b>AUTHORS</b>             | Lan, Guo; Jianxiong, Deng; Yuan, He; Xueqing, Deng; Jinghui, Huang; Guoliang, Huang; Xue, Gao; Lu, CiYong                        |

### VERSION 1 - REVIEW

|                        |                                                                                    |
|------------------------|------------------------------------------------------------------------------------|
| <b>REVIEWER</b>        | Serge Brand<br>Psychiatric Hospital of the University of Basel, Basel, Switzerland |
| <b>REVIEW RETURNED</b> | 17-May-2014                                                                        |

|                         |                                                                                                                                                                                                                                                                                                                                                                                                                                                                                                                                                                                                                                                                                                                                                                                                                                                                                                                                                                                                                                                                                                                                                                                                                                                                                                                                                                                                                                                                                                                                                                                                    |
|-------------------------|----------------------------------------------------------------------------------------------------------------------------------------------------------------------------------------------------------------------------------------------------------------------------------------------------------------------------------------------------------------------------------------------------------------------------------------------------------------------------------------------------------------------------------------------------------------------------------------------------------------------------------------------------------------------------------------------------------------------------------------------------------------------------------------------------------------------------------------------------------------------------------------------------------------------------------------------------------------------------------------------------------------------------------------------------------------------------------------------------------------------------------------------------------------------------------------------------------------------------------------------------------------------------------------------------------------------------------------------------------------------------------------------------------------------------------------------------------------------------------------------------------------------------------------------------------------------------------------------------|
| <b>GENERAL COMMENTS</b> | <p>The authors investigated the relation between sleep and psychological functioning among a large sample of Chinese children and adolescents. The key findings were that a greater amount of participants complained about poor sleep, along with greater psychological difficulties.</p> <p>The study has been very well conducted; the sample size is amazing; references are timely, though, as regards sleep of adolescents in relation to family functioning, please add Kalak et al 2012 and Bajoghli et al 2013. The tools are very well chosen in that the questionnaires are internationally accepted, established and validated. To strengthen the manuscript, I suggest to formulate some study questions/hypotheses and to state to what extent the present study does add to the current literature. P8 I5: OR 1.27 is not significant ('1' within the confidence interval), p8 I13: 3.17: please add CI.</p> <p>References<br/>Kalak N, Gerber M, Kirov R, Mikoteit T, Pühse U, Holsboer-Trachsler E, Brand S. The relation of objective sleep patterns, depressive symptoms, and sleep disturbances in adolescent children and their parents: a sleep-EEG study with 47 families. <i>J Psychiatr Res.</i> 2012 Oct;46(10):1374-82. doi: 10.1016/j.jpsychires.2012.07.006.<br/>Bajoghli H, Alipouri A, Holsboer-Trachsler E, Brand S. Sleep patterns and psychological functioning in families in northeastern Iran; evidence for similarities between adolescent children and their parents. <i>J Adolesc.</i> 2013 Dec;36(6):1103-13. doi: 10.1016/j.adolescence.2013.08.016.</p> |
|-------------------------|----------------------------------------------------------------------------------------------------------------------------------------------------------------------------------------------------------------------------------------------------------------------------------------------------------------------------------------------------------------------------------------------------------------------------------------------------------------------------------------------------------------------------------------------------------------------------------------------------------------------------------------------------------------------------------------------------------------------------------------------------------------------------------------------------------------------------------------------------------------------------------------------------------------------------------------------------------------------------------------------------------------------------------------------------------------------------------------------------------------------------------------------------------------------------------------------------------------------------------------------------------------------------------------------------------------------------------------------------------------------------------------------------------------------------------------------------------------------------------------------------------------------------------------------------------------------------------------------------|

|                 |                                                                                              |
|-----------------|----------------------------------------------------------------------------------------------|
| <b>REVIEWER</b> | Caitlin Murray, MA and Grayson Holmbeck, PHD<br>Loyola University Chicago<br>Chicago, IL USA |
|-----------------|----------------------------------------------------------------------------------------------|

**GENERAL COMMENTS**

The purpose of ms 2014-005517 was to examine prevalence and predictors of sleep disturbance and depressive symptoms in Chinese adolescents. The manuscript has several strengths: (1) the large sample size, (2) the examination of several relevant predictors, and (3) the examination of classroom-level effects.

On the other hand, we had several concerns with this manuscript:

1. The authors did not just study adolescents. Children are ages 9 to 21, which crosses several developmental stages.

2. Terminology for sleep disturbance is often used interchangeable with sleep quality, insomnia, etc. which makes reading and comprehension of this manuscript difficult. The terminology needs to be consistent.

3. The introduction mixes adult, adolescent, Western and Eastern literature without a clear indication of how this study builds on previous research. The introduction also does not delineate the studies that have been China (as stated in the discussion), which also makes it difficult to understand how this study is a unique contribution.

4. Similarly, a compelling rationale is not provided for conducting this study in China. The authors should provide clear rationale for why sleep and depression may vary according to Chinese ethnicity, and whether this study contributes beyond those that have already been conducted. It is not enough to say that there is not enough research- the authors need to provide a compelling rationale for why this study is important.

5. This is a cross-sectional study with a single respondent. As such, the authors are not able to rule out common method variance interpretations for the findings.

6. Many of the measures are single items; this strategy calls into question the degree to which the measures have adequate content validity. Additionally, no clear rationale is provided for the set of predictors included.

7. The authors are encouraged to explain how the Chinese version of the PSQI is different from its original form, and cite a study that has established its validity and reliability. It is not enough to say that this measure is commonly used and "adapted to the realities of China."

8. The CES-D has different cut-off scores for males and females. Why wasn't this used?

9. The CES-D is also not validated for youth younger than 13 years old. Similarly, were separate adolescent (13-17) and adult (18-64) versions used according to age? I also do not believe that you can use the PSQI in individuals younger than 18.

10. Under study design and participants, the authors state that the participants were all middle school students, which is not true.

|  |                                                                                                                                                                                                                                                                                                                                                                                                                                                                                                                                                                                                                                                                                                                                                                                                                                                                                                                                                                                                                                                                                                                                        |
|--|----------------------------------------------------------------------------------------------------------------------------------------------------------------------------------------------------------------------------------------------------------------------------------------------------------------------------------------------------------------------------------------------------------------------------------------------------------------------------------------------------------------------------------------------------------------------------------------------------------------------------------------------------------------------------------------------------------------------------------------------------------------------------------------------------------------------------------------------------------------------------------------------------------------------------------------------------------------------------------------------------------------------------------------------------------------------------------------------------------------------------------------|
|  | <p>11. The authors are studying depressive symptoms, not depression.</p> <p>12. I recommend that a native speaker of English review the paper for word choice and grammar.</p> <p>13. The participation rate is very high, given that active parental consent was employed. Did the researchers actually receive over 99% of consent forms back from parents?</p> <p>14. I did not understand why the DVs were dichotomized, given the loss of information/variability inherent in such a strategy. In general, the statistical analyses section was extremely hard to follow.</p> <p>15. The authors use sleep as an IV in the depressive symptoms analysis and depressive symptoms as an IV in the sleep analyses. These analyses are redundant in a cross-sectional study. In addition, because the study is cross-sectional, the authors cannot make assumptions about directionality (e.g., page 10, lines 9-10).</p> <p>16. I did not understand what the authors meant by “to minimize subjectivity, students were provided with a detailed definition of the information about the PSQI and CES-D” (page 10, lines 18-19).</p> |
|--|----------------------------------------------------------------------------------------------------------------------------------------------------------------------------------------------------------------------------------------------------------------------------------------------------------------------------------------------------------------------------------------------------------------------------------------------------------------------------------------------------------------------------------------------------------------------------------------------------------------------------------------------------------------------------------------------------------------------------------------------------------------------------------------------------------------------------------------------------------------------------------------------------------------------------------------------------------------------------------------------------------------------------------------------------------------------------------------------------------------------------------------|

### VERSION 1 – AUTHOR RESPONSE

#### Review 1

Comment 1: As regard sleep of adolescents in relation to family functioning, please add Kalak et al 2012 and Bajoghli et al 2013 .

Response 1: As requested, we have added the two references in the Introduction (Page 5, lines 9-10 and the Discussion (Page 13, lines 8-11) to strengthen the discussion of sleep in adolescents and family functioning.

Comment 2: Please formulate some study questions/ hypotheses and state to what extent the present study does add to the current literature.

Response 2: Thank you for your kind suggestion. We have formulated three hypotheses in the revised Introduction (Page 6, lines 1-7) to make our study purpose and expected outcomes more clear. Furthermore, we have cited several similar studies 1-4 in the Introduction to summarize the present research progress in China, and we have adjusted the structure and contents of the Introduction to make it more logical (Pages 4-6).

Comment 3: The OR=1.27 in Page 8, Line 5 is not significant ('1' within the confidence interval).

Response 3 : Thank you for carefully and patiently reviewing our manuscript, and noticing this mistake in the original manuscript. We have re-examined the manuscript and re-analyzed the data. That sentence has been changed to “Adolescents with below-average family relationships (AOR=1.54, 95% CI=1.06-2.26) had a slightly higher probability of sleep disturbance” in the revised manuscript (Page 11, lines 9-11).

Comment 4: Please add 95% Confidence interval (CI) of the OR=3.17 in Page 8, Line 13.

Response 4: We have changed that sentence to “...students who had depressive symptoms were

2.47 (95% CI=1.61-3.79) times more likely to suffer from sleep disturbance than those who did not.” (Page 11, lines 20-22)

#### Review 2

Comment 1: The authors did not just study adolescents. Children are ages 9 to 21, which cross several developmental stages.

Response 1: We thank the reviewer for these comments. We have excluded the sampled students who were not 13 to 18 years old. This information has been added to our revised manuscript (Page 9, lines 19-21).

Comment 2: Terminology for sleep disturbance is often used interchangeable with sleep quality, insomnia, etc. which makes reading and comprehension of this manuscript difficult. The terminology needs to be consistent.

Response 2: Based on this suggestion, we have unified the terminology as “sleep disturbance” to make the paper more clear and understandable.

Comment 3: The introduction mixes adult, adolescent, Western and Eastern literature without a clear indication of how this study builds on previous research. The introduction also does not delineate the studies have been China (as stated in the discussion), which also make it difficult to understand how this study is a unique contribution.

Response 3: We thank the reviewer for this suggestion. We have adjusted the structure and contents of the Introduction to make it more logical, and we have cited several similar studies in the Introduction to explain the context of the present study in China.1-4 Furthermore, we have clearly stated the purposes of our study: to estimate the prevalence of sleep disturbance and depressive symptoms, to comprehensively examine the possible factors contributing to sleep disturbance and depressive symptoms (among the demographic, school, family, and psychosocial domains), and to discuss the link between sleep disturbance and depressive symptoms. We have added three hypotheses in the Introduction to clarify the importance of our study (Pages 4-6).

Comment 4: The authors should provide clear rationale for why sleep and depressive symptoms may vary according to Chinese ethnicity, and whether this study contributes beyond those that have already been conducted.

Response 4: Thank you for your kind suggestion. Because 99% of the students involved were of Han ethnicity, we did not analyze the different Chinese ethnicities in this paper. We have deleted this sentence. We think that the revised Introduction clearly summarizes the different results among studies in different countries, showing that they have not reported uniform results about sleep disturbance and depressive symptoms (Pages 4-6).

In addition, we have adjusted the structure and contents of the Discussion to make it flow more logically. We have added several similar studies to compare with our study, 2 5-10 and their results are largely consistent with ours. Our study reports more representative results about the current prevalence of sleep disturbance and depressive symptoms among Chinese adolescents, detected more comprehensive contributing factors to sleep disturbance and depressive symptoms, and clearly showed there was a link between sleep disturbance and depressive symptoms (Pages 12-15).

Comment 5: This is a cross-sectional study with a single respondent. As such, the authors are not able to rule out common method variance interpretations for the findings.

Response 5: We entirely agree with the reviewer that a cross-sectional study cannot rule out common-method variance interpretations for the findings. Unfortunately, we are unable to correct this in the current study, but we will adopt other study designs in our future research. This limitation has been added to the Discussion (Page 14, lines 22-25).

Comment 6: Many of the measures are single items; this strategy calls into question the degree to which the measures have adequate content validity. Additionally, no clear rationale is provided for the set of predictors included.

Response 6: We thank the reviewer for these comments. We chose those potential risk factors based on a review of the literature, so we think the measures have adequate content validity. Additionally, most of the measures of independent variables were designed according to the real status of an adolescent, meaning there is no correct way to evaluate the content validity.

Comment 7: The authors are encouraged to explain how the Chinese version of the PSQI is different from its original form, and cite a study that has established its validity and reliability.

Response 7: We apologize for the incomplete information about CPSQI in the original manuscript. We have explained there is no substantive difference between the Chinese version of Sleep Quality Index (CPSQI) and the original form. The CPSQI was translated into Mandarin Chinese to better correspond to the meaning of the original, and it has been shown to be valid and reliable and is commonly used (Page 8, lines 12-14). Furthermore, we added a reference about the CPSQI to emphasize that it is not different from the original in structure or content. 11

Comment 8: The CES-D has different cut-off scores for males and females. Why wasn't this used?

Response 8: The original recommended cut-off score for having depressive symptoms was 16 points (corresponding to the 80th percentile) by the founder of the CES-D in 1977, and the original cut-off score was uniform for males and females. 12 With the changing times and social development, there have been no definitely uniform cut-off scores of the CES-D worldwide, and many researchers have adopted different cut-off scores for having depressive symptoms. 13 14 Furthermore, most of the previous studies did not provide definitely recommended cut-off scores for males and females, 13 15-17 except that a study in 1991 by Garrison referred to the different cut-off scores. 18 In our study, we adopted the 80th percentile (a score greater than 28 indicating "having depressive symptoms") as the cut-off score, and the area under the ROC curve was 0.78 (Page 8, lines 21-27). We have provided a statistical analysis of the gender difference in CES-D scores, which showed that the difference was not significant ( $P>0.05$ ) (Page 10, lines 19-21). Therefore, we used a uniform cut-off score for boys and girls. Considering our research is an epidemiological study using a questionnaire, there existed measuring error about the presence of depressive symptoms, so we will add clinical objective diagnoses of depressive symptoms in a future study.

Comment 9: The CES-D is also not validated for youth younger than 13 years old. Similarly, were separate adolescent (13-17) and adult (18-64) versions used according to age? I also do not believe that you can use the PSQI in individuals younger than 18.

Response 9: As requested, we have excluded the sampled students who were not 13 to 18 years old, and this information have been added in our revised manuscript (Page 9, lines 20-21). Thus, the adolescents' version of CES-D is validated for the participants in our study.

As for the use of the PSQI, we referred to previous studies that used the PSQI to evaluate sleep among adolescents, 19-24 and many Chinese studies also used the PSQI to evaluate adolescents' sleep. 25 26 Given a lack of consensus when defining and measuring sleep among adolescents, we used the PSQI. These previous studies demonstrate that the PSQI may be applicable to the population we studied, although further studies are required to confirm it. Furthermore, we have added that the questionnaires involved in our study were completed and qualified for our survey in the Results section, so the contents of PSQI filled out by the students confirm the practical situation (Page 9, lines 19-20).

Comment 10: Under study design and participants, the authors state that the participants were all middle school students, which is not true.

Response: In our study, all the participants were students sampled from grades 7-9 (junior high school) and grades 10-12 (high school). We apologize for the misunderstanding caused by our unclear descriptions, and we have corrected "middle school students" students to "high school students" in our revised manuscript (Page 6, lines 15).

Comment 11: The authors are studying depressive symptoms, not depression.

Response 11: Thank you for noticing this. We have replaced "depression" with "depressive symptoms" throughout the revised manuscript.

Comment 12: I recommend that a native speaker of English review the paper for word choice and grammar.

Response 12: According to the reviewer's suggestion, we have invited a native English speaker to revise the whole manuscript carefully. We hope that the language is now acceptable for the next review process.

Comment 13: The participation rate is very high, given that active parental was employed. Did the researchers actually receive over 99% of consent forms back from parents?

Response 13: Yes. The written consent letters were obtained from the school, from each participating student and from one of student's parents after our researcher had informed them of the purpose of our study. We have clarified this point in the subsection on data collection (Page 6, lines 25-28). Furthermore, we must gratefully acknowledge the contribution of the Guangdong Education Bureau, its participating schools, and the teachers of the participating schools to help use receive over 99% of the consent forms from the parents without pay; we have expressed great thanks in the Acknowledgments section (Page 15, lines 20-22).

Comment 14: I did not understand why the DVs were dichotomized, given the loss of information/variability inherent in such a strategy. In general, the statistical analyses section was extremely hard to follow.

Response 14: Thank you for your kind suggestion. First of all, our main purpose is to investigate the prevalence and correlates of depressive symptoms among Chinese adolescents, so the variable of depressive symptoms was categorized into two levels, presence and absence, to estimate the prevalence of adolescents with depressive symptoms. We used logistic regression analysis to explore the potentially contributing factors to depressive symptoms, and this analysis required the dependent variable be categorized. We agree that we will lose information by adopting the strategy of dichotomizing the DVs, and we would like to address this issue in our future studies.

In addition, according to the reviewer's suggestion, we have improved the statistical analysis section to make it more understandable (Page 9, lines 11-15). We used a cross-sectional survey utilizing the stratified-cluster random-sampling technique for subject recruitment. Hence, students were clustered in classes. Because the sample was generated as a clustered sample, analyses of data took into consideration the clustering effects of classes, so we adopted multi-level analyses (the generalized linear mixed-effects models adopting the GLMMIX procedure in SAS) in which classes were treated as clusters in the multivariate logistic regression analyses.

Comment 15: The authors use sleep as an IV in the depressive symptoms analysis and depressive symptoms as an IV in the sleep analyses. These analyses are redundant in a cross-sectional study. In addition, because the study is cross-sectional, the authors cannot make assumptions about directionally. (e.g., page 10, lines 9-10)

Response 15: The reviewer is correct. We know that the data are cross-sectional, so no causal inference can be made regarding the observed relationships between sleep disturbance and depressive symptoms, and that was an expression error in the original manuscript. We have deleted the sentence "we observed that depression can lead to sleep disturbances, and vice versa", and clearly written that there was a link between sleep disturbance and depressive symptoms, whose direction was difficult to determine due to the nature of this cross-sectional study (Page 14, lines 11-15).

Comment 16: I did not understand what the authors meant by "to minimize subjectivity, students were provided with a definition of the information about the PSQI and CES-D" (Page 10, lines 18-19).

Response 16: We apologize for the misunderstanding caused by our unclear statements. This statement has been clarified as, "To minimize incorrect or unavailable data given by students who did not fully understand the contents of the PSQI and the CES-D, we have provided a detailed explanation of the PSQI and CES-D" (Page 15, lines 1-3).

#### References:

1. Liu X, Uchiyama M, Okawa M, Kurita H. Prevalence and correlates of self-reported sleep problems among Chinese adolescents. *Sleep* 2000;23(1):27-34.
2. Xu Z, Su H, Zou Y, Chen J, Wu J, Chang W. Sleep quality of Chinese adolescents: distribution and its associated factors. *J Paediatr Child Health* 2012;48(2):138-45.
3. Chung KF, Cheung MM. Sleep-wake patterns and sleep disturbance among Hong Kong Chinese adolescents. *Sleep* 2008;31(2):185-94.
4. Li SH, Shen XM, Jin XM, Yan CH, Wu SH, Jiang F, et al. [Sleep habits and sleep disturbance in school-age children of China]. *Zhonghua Er Ke Za Zhi* 2008;46(3):185-9.
5. Kalak N, Gerber M, Kirov R, Mikoteit T, Puhse U, Holsboer-Trachsler E, et al. The relation of objective sleep patterns, depressive symptoms, and sleep disturbances in adolescent children and their parents: a sleep-EEG study with 47 families. *J Psychiatr Res* 2012;46(10):1374-82.

6. Goldstein TR, Bridge JA, Brent DA. Sleep disturbance preceding completed suicide in adolescents. *J Consult Clin Psychol* 2008;76(1):84-91.
7. Tucker JS, Edelen MO, Ellickson PL, Klein DJ. Running away from home: a longitudinal study of adolescent risk factors and young adult outcomes. *J Youth Adolesc* 2011;40(5):507-18.
8. Byars KC, Yeomans-Maldonado G, Noll JG. Parental functioning and pediatric sleep disturbance: an examination of factors associated with parenting stress in children clinically referred for evaluation of insomnia. *Sleep Med* 2011;12(9):898-905.
9. Ivanenko A, Crabtree VM, Gozal D. Sleep and depression in children and adolescents. *Sleep Med Rev* 2005;9(2):115-29.
10. Siegel JM, Platt JJ, Peizer SB. Emotional and social real-life problem-solving thinking in adolescent and adult psychiatric patients. *J Clin Psychol* 1976;32(2):230-2.
11. Tsai PS, Wang SY, Wang MY, Su CT, Yang TT, Huang CJ, et al. Psychometric evaluation of the Chinese version of the Pittsburgh Sleep Quality Index (CPSQI) in primary insomnia and control subjects. *Qual Life Res* 2005;14(8):1943-52.
12. Radloff LS, editor *The CES-D scale: A self-report depression scale for research in the general populations.*, 1977.
13. Salazar-Pousada D, Arroyo D, Hidalgo L, Perez-Lopez FR, Chedraui P. Depressive Symptoms and Resilience among Pregnant Adolescents: A Case-Control Study. *Obstet Gynecol Int* 2010;2010:952493.
14. Zhang Jie WZFG. Development of the Chinese age norms of CES-D in urban area. *Chinese Mental Health Journal*. (In Chinese). 2010(02):139-143.
15. Salinas-Rodriguez A, Manrique-Espinoza B, Acosta-Castillo I, Tellez-Rojo MM, Franco-Nunez A, Gutierrez-Robledo LM, et al. [Validation of a cutoff for the Depression Scale of the Center for Epidemiologic Studies, Brief Version (CESD-7)]. *Salud Publica Mex* 2013;55(3):267-74.
16. .
17. Olsson G, von Knorring AL. Depression among Swedish adolescents measured by the self-rating scale Center for Epidemiology Studies-Depression Child (CES-DC). *Eur Child Adolesc Psychiatry* 1997;6(2):81-7.
18. Garrison CZ, Addy CL, Jackson KL, McKeown RE, Waller JL. The CES-D as a screen for depression and other psychiatric disorders in adolescents. *J Am Acad Child Adolesc Psychiatry* 1991;30(4):636-41.
19. Lunsford-Avery JR, Orr JM, Gupta T, Pelletier-Baldelli A, Dean DJ, Smith WA, et al. Sleep dysfunction and thalamic abnormalities in adolescents at ultra high-risk for psychosis. *Schizophr Res* 2013;151(1-3):148-53.
20. Bajoghli H, Alipouri A, Holsboer-Trachsler E, Brand S. Sleep patterns and psychological functioning in families in northeastern Iran; evidence for similarities between adolescent children and their parents. *J Adolesc* 2013;36(6):1103-13.
21. Mesquita G, Reimao R. Nightly use of computer by adolescents: its effect on quality of sleep. *Arq Neuropsiquiatr* 2007;65(2B):428-32.
22. Mesquita G, Reimao R. Stress and sleep quality in high school brazilian adolescents. *An Acad Bras Cienc* 2010;82(2):545-51.
23. Cheung LM, Wong WS. The effects of insomnia and internet addiction on depression in Hong Kong Chinese adolescents: an exploratory cross-sectional analysis. *J Sleep Res* 2011;20(2):311-7.
24. Kaneita Y, Yokoyama E, Harano S, Tamaki T, Suzuki H, Munezawa T, et al. Associations between sleep disturbance and mental health status: a longitudinal study of Japanese junior high school students. *Sleep Med* 2009;10(7):780-6.
25. Juan C. Study on Sleep Quality Status and Relationship of Physical and Mental Health, Life Events in Adolescent. (in Chinese). Anhui Medical University, 2008.
26. Yan Youwei LRTX. Young students anxiety sensitivity and the relationship between sleep quality and its inner mechanism. (in Chinese). *Psychological science* 2011(04):987-992.
